# Supplementary material
Source: Springer Nature journal article supplement (https://www.springermedizin.de/resource/supplementary/12947_2007_179_MOESM3_ESM.pdf/9556398)

Map 3  
150dB/C2  
Persist Low  
Fr Rate High  
2D OptHRes  
BW 0 Pg 0  
Col 0 Pg 0

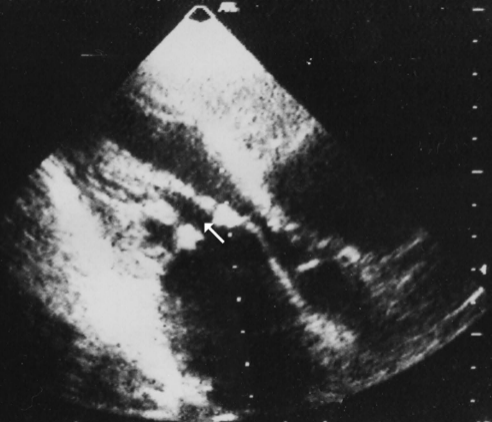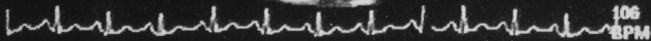

106  
BPM

Supplement: MOESM3 [file 9556398]
